# Supplementary material for: New age constraints reveal moraine stabilization thousands of years after deposition during the last deglaciation of western New York, USA
Source: Copernicus journal article supplement (doi:10.5194/gchron-6-409-2024), 2024-07-22
Supplement: Supplementary file 1 [file gchron-6-409-2024-supplement.pdf]

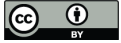

*Supplement of*

**New age constraints reveal moraine stabilization thousands of years after deposition during the last deglaciation of western New York, USA**

**Karlee K. Prince et al.**

*Correspondence to:* Karlee K. Prince (karleepr@buffalo.edu)

The copyright of individual parts of the supplement might differ from the article licence.

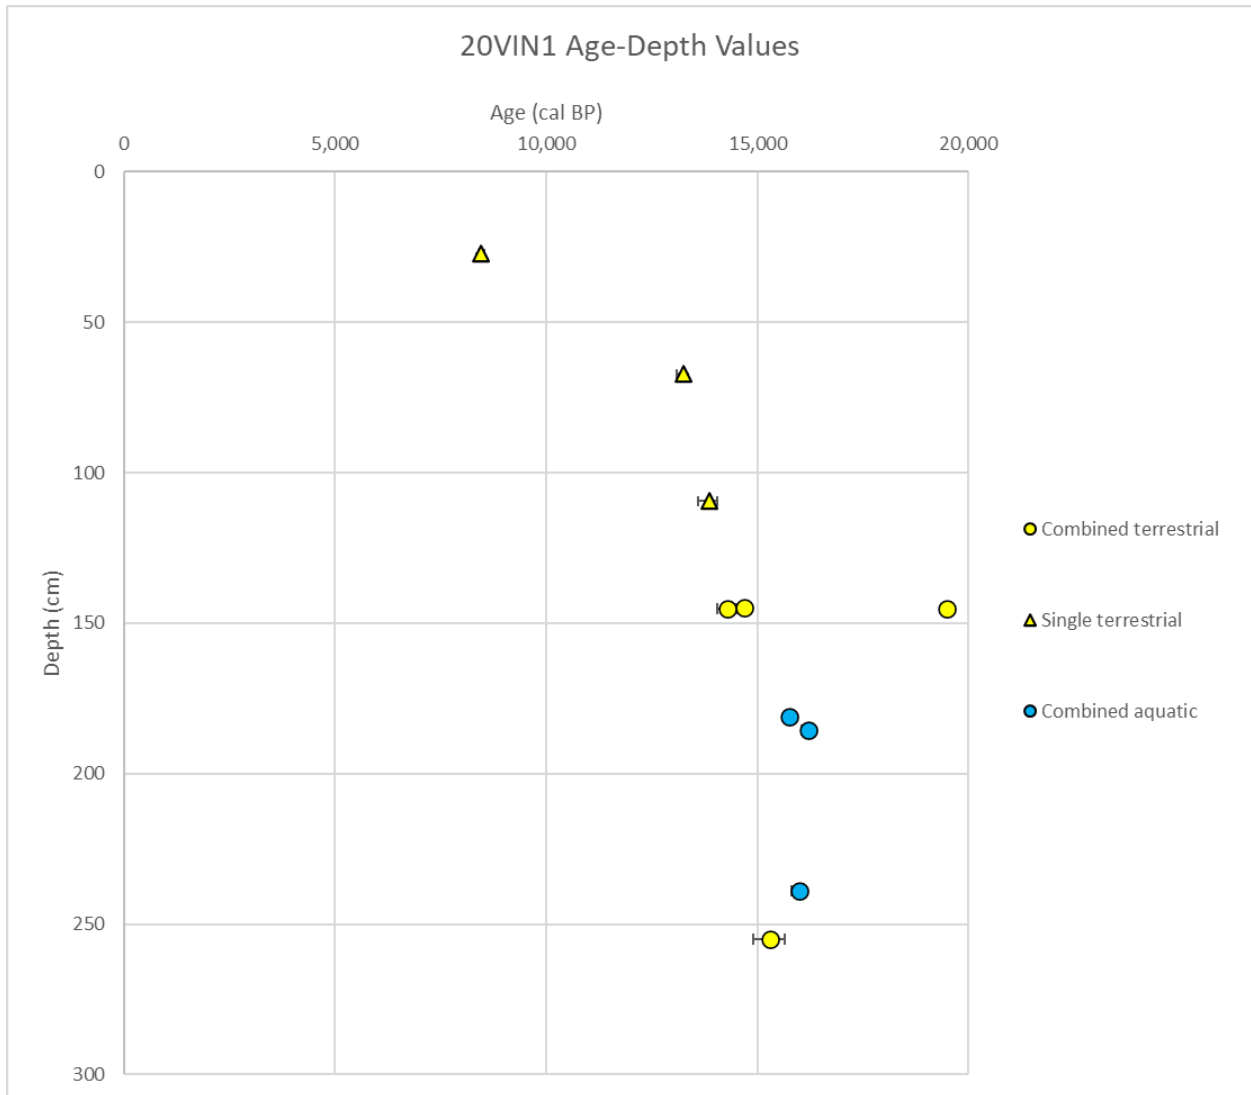

1  
 2 Figure S1. 20VIN1 age-depth values plotted by depth and symbolized by terrestrial vs aquatic nature and single vs  
 3 combined nature. Depth begins at the top of the sediment core and for this coring location that is the surface of the  
 4 bog.

5  
 6  
 7  
 8  
 9

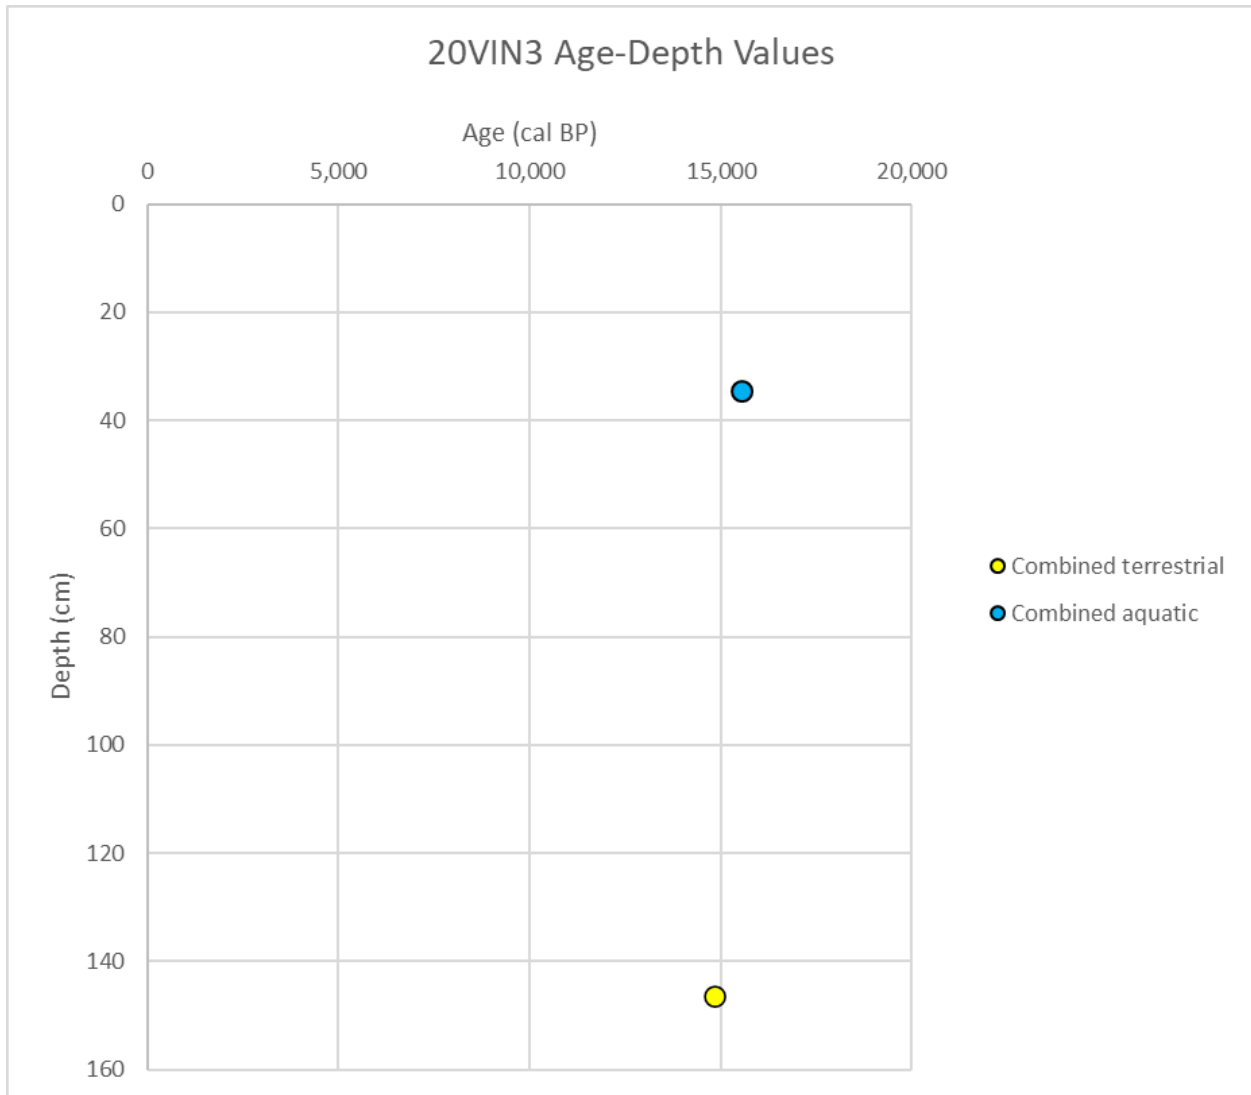

10

11 Figure S2. 20VIN3 age-depth values plotted by depth and symbolized by terrestrial vs aquatic nature and single vs  
 12 combined nature. Depth begins at the top of the sediment core and for this coring location that is not the surface of  
 13 the bog.

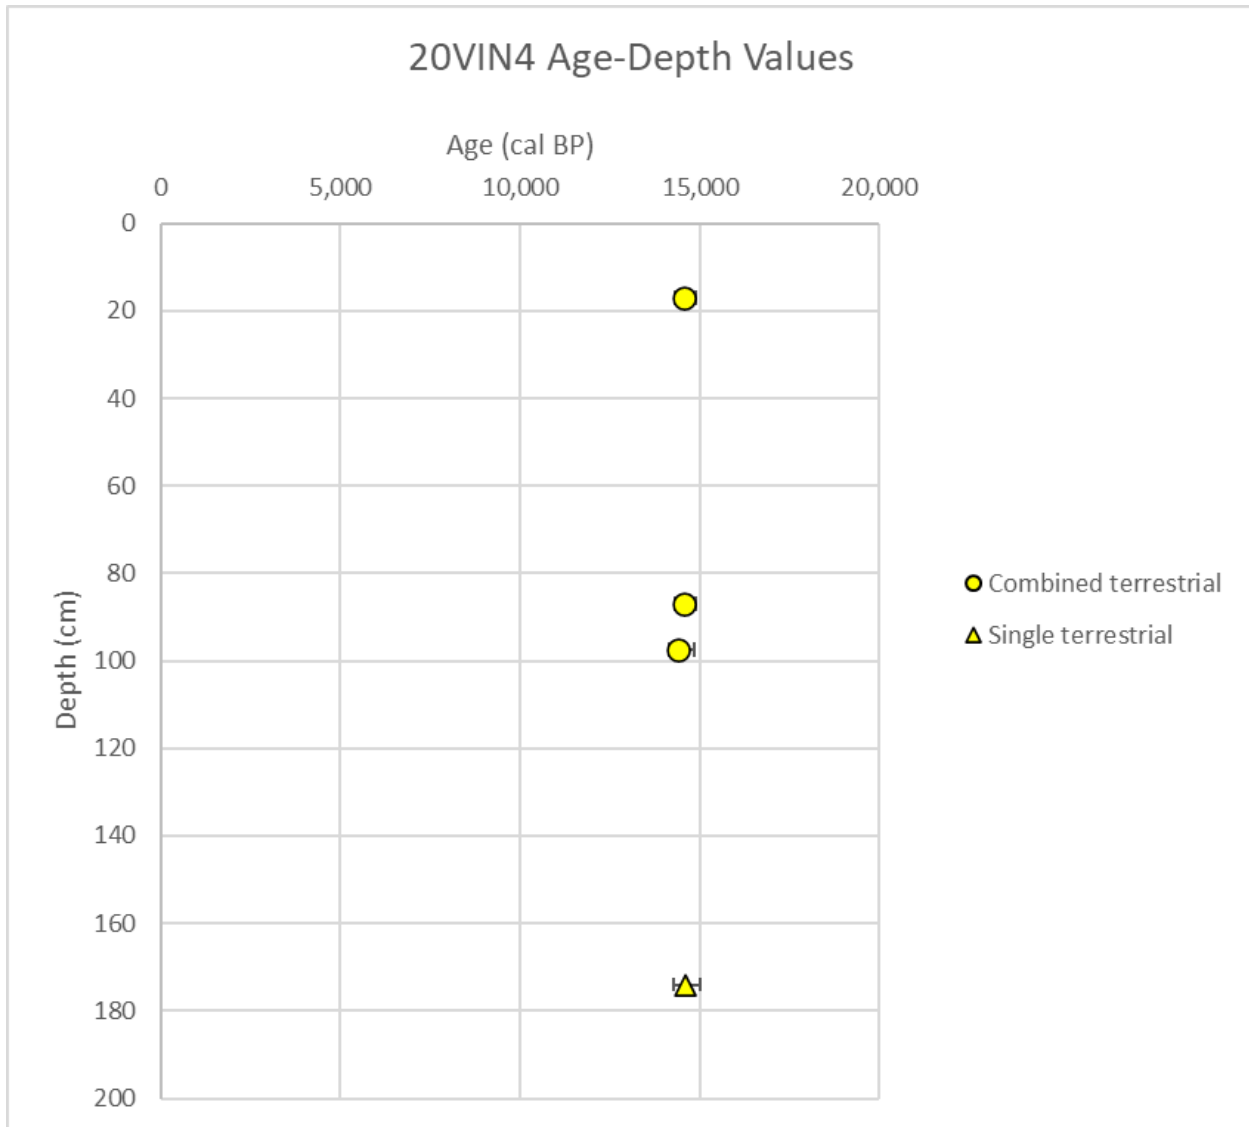

14

15 Figure S3. 20VIN4 age-depth values plotted by depth and symbolized by terrestrial vs aquatic nature and single vs  
 16 combined nature. Depth begins at the top of the sediment core and for this coring location that is not the surface of  
 17 the bog.

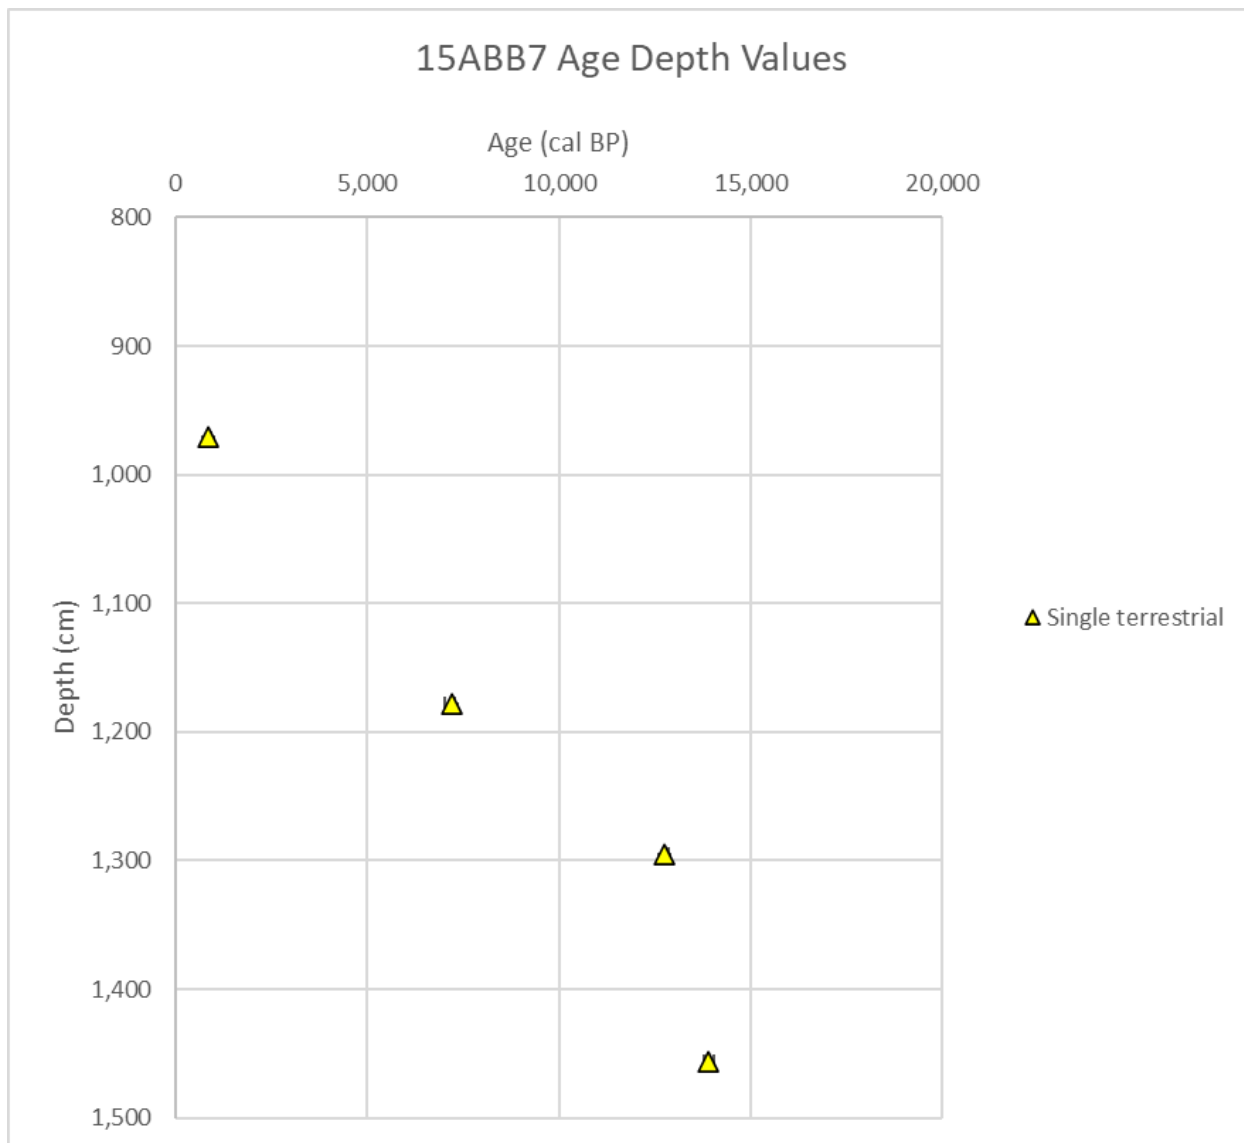

18

19 Figure S4. 15ABB7 age-depth values plotted by depth and symbolized by terrestrial vs aquatic nature and single vs  
 20 combined nature. Depth begins at the top of the sediment core and for this coring location that is not the surface of  
 21 the bog.

22

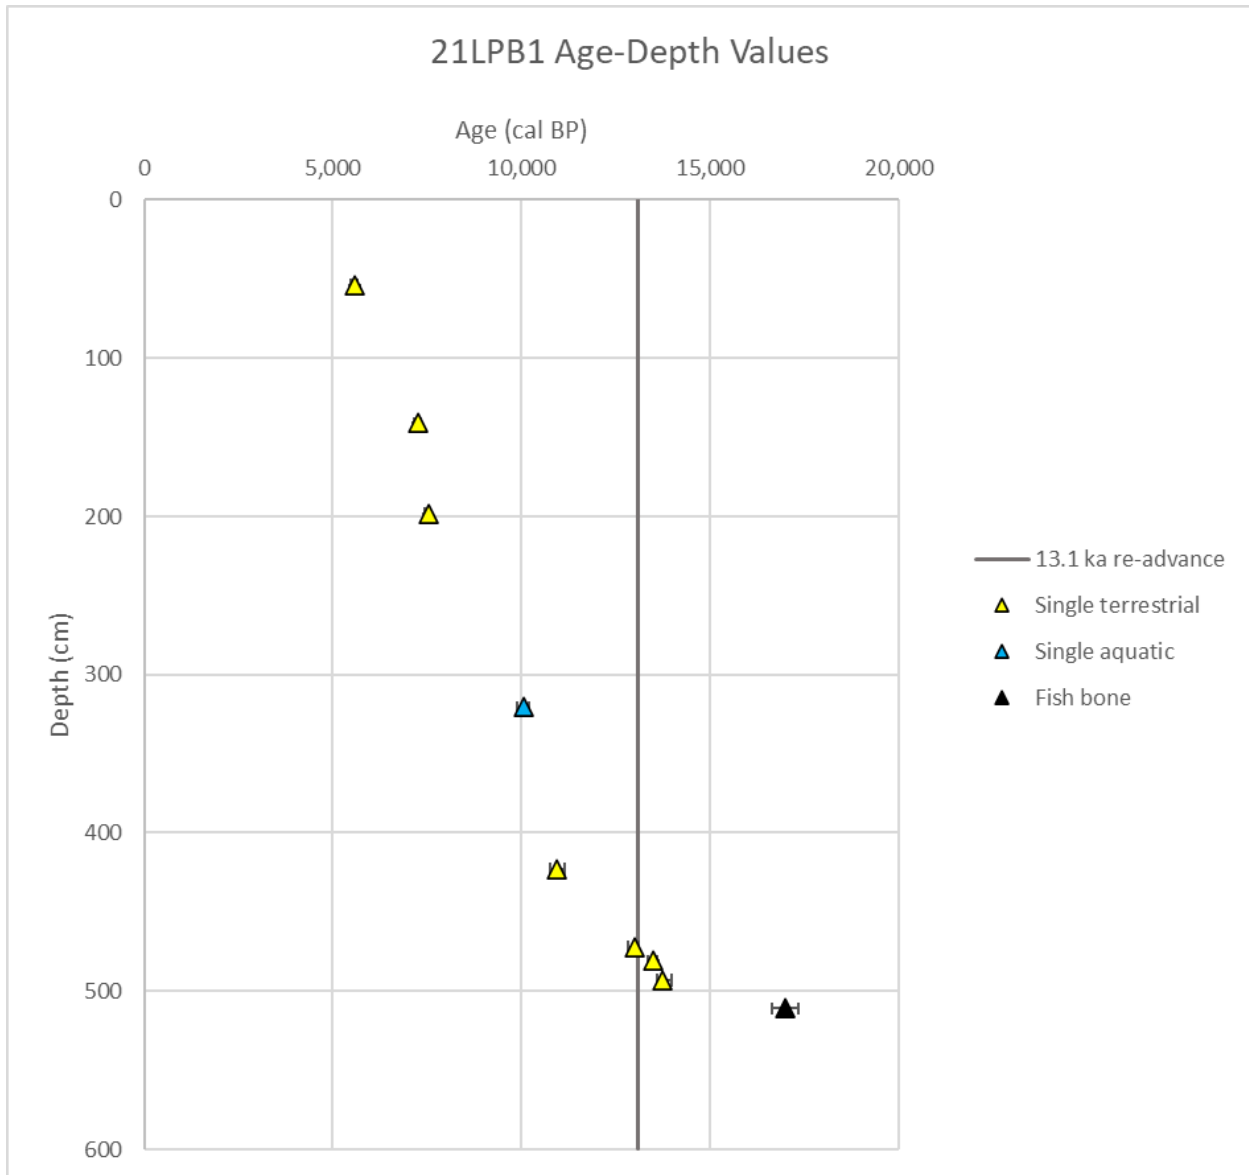

23

24 Figure S5. 21LPB1 age-depth values plotted by depth and symbolized by terrestrial vs aquatic nature and single vs  
 25 combined nature. The timing of the Allerød re-advance hypothesis is shown by the gray line. Depth begins at the top  
 26 of the sediment core and for this coring location that is the surface of the bog.

27

28

29

30

31

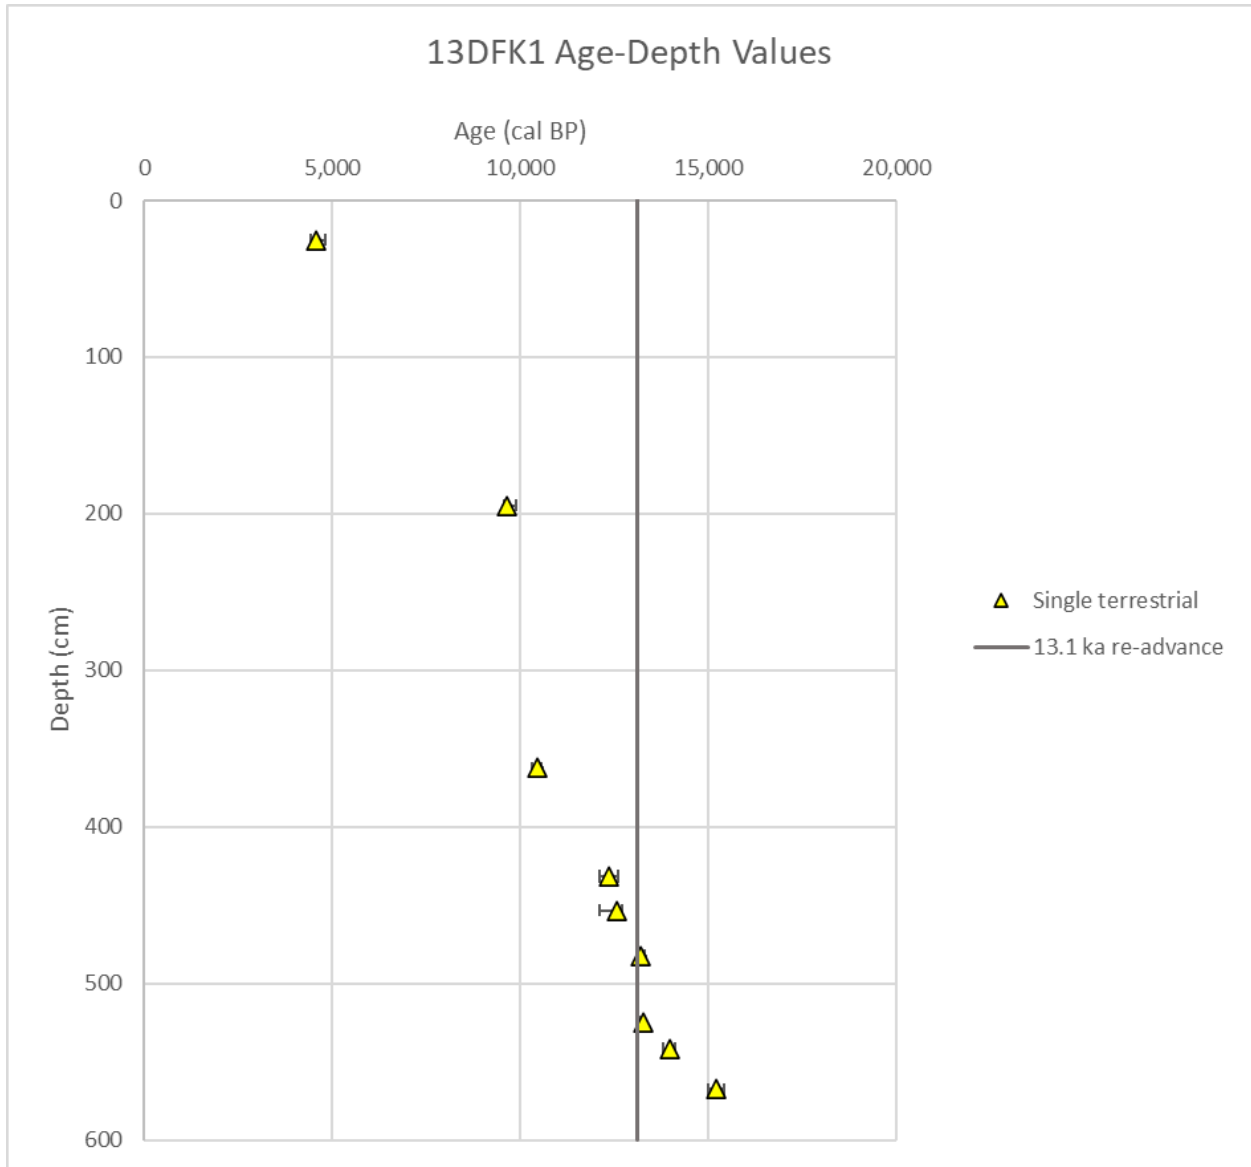

32

33

34 Figure S6. 13DFK1 age-depth values plotted by depth and symbolized by terrestrial vs aquatic nature and single vs  
 35 combined nature. The timing of the Allerød re-advance hypothesis is shown by the gray line. Depth begins at the top  
 36 of the sediment core and for this coring location that is the surface of the bog.

37

38

39

40

41

42

Table S1. Dose Rate Information

| USU num. | Lat/Long               | In-situ H <sub>2</sub> O (%) | D <sub>R</sub> Subsample <sup>1</sup> | K(%) <sup>2</sup> | Rb (ppm) <sup>2</sup> | Th (ppm) <sup>2</sup> | U (ppm) <sup>2</sup> | Cosmic (Gy/kyr) |
|----------|------------------------|------------------------------|---------------------------------------|-------------------|-----------------------|-----------------------|----------------------|-----------------|
| USU-3622 | 42.11394/<br>-78.94899 | 7.5                          | F: 70%                                | 1.64±0.04         | 77.6±3.1              | 7.8±0.7               | 2.6±0.2              | 0.18±0.02       |
|          |                        |                              | M: 20%                                | 1.12±0.03         | 58.7±2.3              | 8.6±0.8               | 2.2±0.2              |                 |
|          |                        |                              | C: 10%                                | 1.29±0.03         | 76.1±3.0              | 11.1±1.0              | 2.1±0.1              |                 |
| USU-3623 | 42.11394/<br>-78.94899 | 20.0                         | F: 85%                                | 1.52±0.04         | 74.4±3.0              | 8.3±0.7               | 2.0±0.1              | 0.18±0.02       |
|          |                        |                              | M: 15%                                | 1.35±0.03         | 72.7±2.9              | 8.4±0.8               | 2.4±0.2              |                 |

<sup>1</sup> Dose rate (D<sub>R</sub>) subsamples based on grain size: fine-F (<1.7 mm), medium-M (1.7-16 mm), coarse-C (>16 mm), and weighted proportions (%) of subsamples used with chemistry in gamma dose rate calculation. Beta dose rate uses chemistry from fine fraction (<1.7 mm) only.

<sup>2</sup> Radioelemental concentrations determined using ICP-MS and ICP-AES techniques; dose rate is derived from concentrations by conversion factors from Guérin et al. (2011).



USU-3622

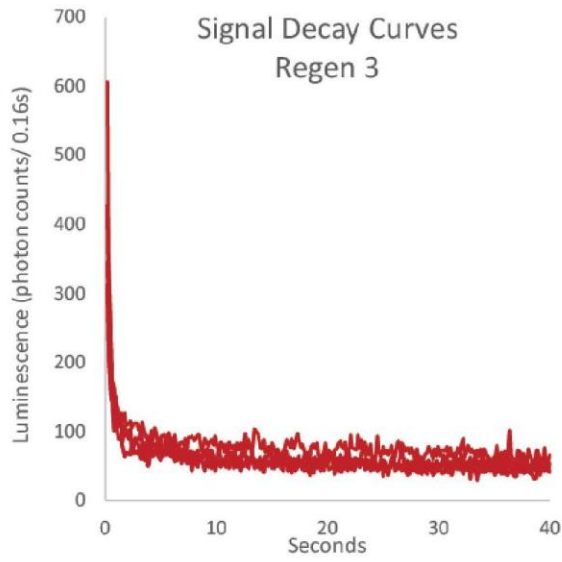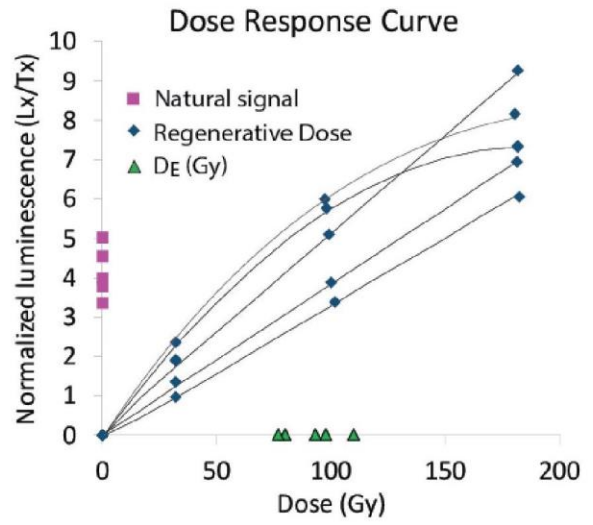

USU-3623

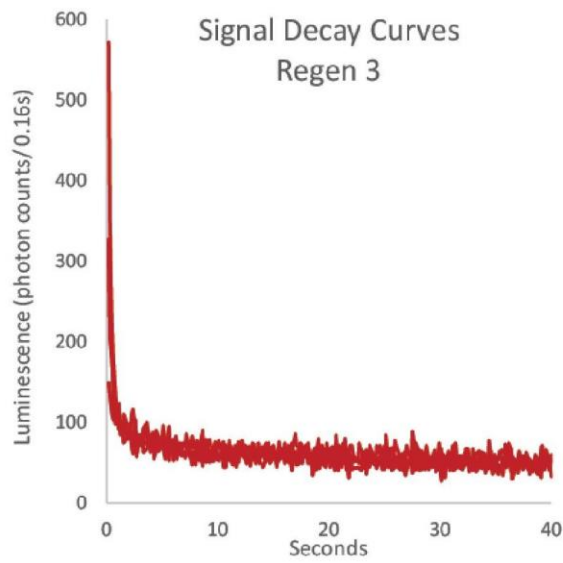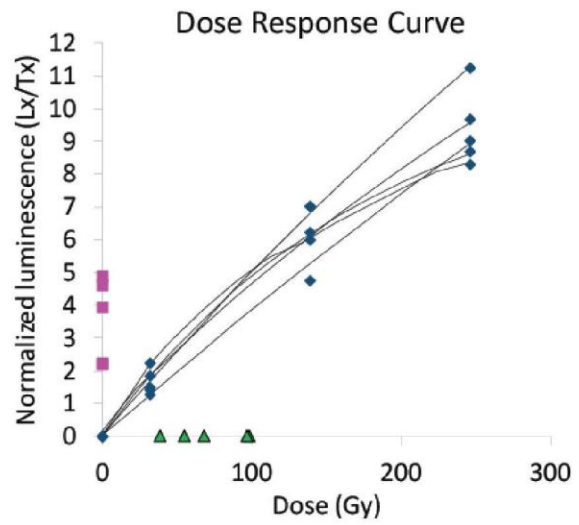

46

47 Figure S7. Example luminescence signal decay (left) and dose-response curves from 5 aliquots from each of the  
48 luminescence samples.
